# Supplementary material
Source: PubMed Central journal article supplement (PMC6309269)
Supplement: NIHMS988318-supplement-Supplemental_2.pdf [file NIHMS988318-supplement-Supplemental_2.pdf]

**Supplemental Table 2. ER and PR IHC results in paired untreated primary tumor and treated tumor**

| Case | ESR1 alteration                           | Tumor with ESR1 alteration | ER (% intensity, clone) |                   | PR (% intensity, clone) |                   |
|------|-------------------------------------------|----------------------------|-------------------------|-------------------|-------------------------|-------------------|
|      |                                           |                            | Tumor 1 (Untreated)     | Tumor 2 (Treated) | Tumor 1 (Untreated)     | Tumor 2 (Treated) |
| 1    | p.D538G(c.1613A>G)                        | Tumor2                     | 95S, 6F11               | 95M, 6F11         | 95S, 1E2                | 50M, 1E2          |
| 2    | p.D538G(c.1613A>G)                        | Tumor2                     | 90S, 6F11               | 95S, 6F11         | 10W-M, 1E2              | 80M-S, 1E2        |
| 3    | p.Y537S(c.1610A>C)                        | Tumor2                     | 95 M-S, 6F11            | 95S, 6F11         | 90S, 1E2                | 85-90S, 1E2       |
| 4    | p.D538G(c.1613A>G),<br>p.Y537C(c.1610A>G) | Tumor2                     | 95S, 6F11               | 99S, 6F11         | 90S, 1E2                | 99S, 1E2          |
| 5    | p.S463P(c.1387T>C),<br>Amplification      | Tumor2                     | 20M, 1D5                | 80M, 1D5          | 25M, PgR636             | 15S, PgR636       |
| 6    | p.D538G(c.1613A>G)                        | Tumor2                     | 100S, 6F11              | 99M, 6F11         | 0, 1E2                  | 95W-M, 1E2        |
| 7    | p.D538G(c.1613A>G)                        | Tumor2                     | 80S, 6F11               | 70W-M, 6F11       | 10M, 1E2                | 5W, 1E2           |
| 8    | p.F461V(c.1381T>G)                        | Tumor2                     | 90S, N/A                | 99S, 6F11         | 50S, N/A                | 95S, 1E2          |
| 9    | p.D538G(c.1613A>G)                        | Tumor2                     | 65S, 1D5                | 99S, 6F11         | <1W, PgR636             | 5-10W, 1E2        |
| 10   | p.L536Q(c.1607_1608TC>AG)                 | Tumor2                     | 90S, 6F11               | 95S, 6F11         | 30M, PgR636             | 30M-S, 1E2        |
| 11   | p.D538G(c.1613A>G)                        | Tumor2                     | 95S, 6F11               | 90M-S, 6F11       | 20M, 1E2                | 50M, 1E2          |
| 12*  | p.E380Q(c.1138G>C)                        | Tumor2                     | 75M, 1D5                | 95S, 6F11         | 15M, PgR636             | 1M, 1E2           |
| 13   | p.Y537S(c.1610A>C)                        | Tumor2 <sup>†</sup>        | 90S, SP1                | 80M, 6F11         | 25S, 1E2                | 90S, 1E2          |
| 14   | p.D538G(c.1613A>G)                        | Tumor2                     | 80S, N/A                | 90S, 6F11         | 0, N/A                  | 90S, 1E2          |
| 15*  | p.V422del<br>(c.1265_1267delTGG)          | Tumor2                     | 99S, 6F11               | 80S, 6F11         | 95S, 1E2                | 0, 1E2            |
| 16*  | p.D538G(c.1613A>G)                        | Tumor2                     | 80M-S, 6F11             | 70W, 6F11         | 40M-S, 1E2              | <1W, 1E2          |
| 17   | p.Y537S(c.1610A>C)                        | Tumor2                     | 97S, SP1                | 75S, 6F11         | 0, 1E2                  | 5M, 1E2           |
| 18   | p.D538G(c.1613A>G)                        | Tumor2                     | 80S, N/A                | 90S, 6F11         | 80S, N/A                | 90S, 1E2          |

|     |                           |                     |           |                |                  |               |
|-----|---------------------------|---------------------|-----------|----------------|------------------|---------------|
| 19* | p.D538G(c.1613A>G)        | Tumor2              | 95S, SP1  | 80S, 6F11      | 20S, 1E2         | <1W, 1E2      |
| 20  | p.Y537C(c.1610A>G)        | Tumor2              | 90S, 1D5  | 99S, SP1       | 40M,<br>PgR636   | 99S, 1E2      |
| 21  | p.D538G(c.1613A>G)        | Tumor2              | 90S, N/A  | 95S, 6F11      | <10W, N/A        | 2M, 1E2       |
| 22  | p.D538G(c.1613A>G)        | Tumor2              | 83S, 1D5  | 99S, 6F11      | 12S,<br>PgR636   | 50W-M,<br>1E2 |
| 23  | p.K520fs(c.1560dupA)      | Tumor1 <sup>§</sup> | 65M, 6F11 | 90S, 6F11      | 60M, 1E2         | 20S, 1E2      |
| 24  | p.D538G(c.1613A>G)        | Tumor2 <sup>†</sup> | 90S, N/A  | 99S, 6F11      | 70S, N/A         | 60M, 1E2      |
| 25  | Amplification             | Tumor2              | 40S, N/A  | 90S, 6F11      | 40S, N/A         | 60S, 1E2      |
| 26  | p.E380Q(c.1138G>C)        | Tumor2              | 90S, SP1  | 90S, 6F11      | 90S, 1E2         | 90S, 1E2      |
| 27  | p.L536Q(c.1607_1608TC>AG) | Tumor2              | 100S, SP1 | 90M, 6F11      | 80S, 1E2         | 80M-S,<br>1E2 |
| 28  | Amplification             | Tumor2              | 91S, SP1  | 95S, 6F11      | 66M, 1E2         | 95S, 1E2      |
| 29  | Amplification             | Tumor2              | 90S, 1D5  | 95M-S,<br>6F11 | 0, PgR636        | 0, 1E2        |
| 30  | Amplification             | Tumor1 <sup>§</sup> | 99S, 6F11 | 100S, SP1      | 95S, 1E2         | 90M-S,<br>1E2 |
| 31  | Amplification             | Tumor2              | 100S, 1D5 | 99S, 6F11      | 50S,<br>PgR636   | 5-10S, 1E2    |
| 32  | p.D538G(c.1613A>G)        | Tumor2              | 95S, N/A  | 95S, 6F11      | 60-70M-S,<br>N/A | 95M-S,<br>1E2 |
| 33  | p.Y537S(c.1610A>C)        | Tumor2              | 100S, SP1 | 60S, 6F11      | 30S, 1E2         | 90S, 1E2      |
| 34  | p.Y537S(c.1610A>C)        | Tumor2              | 90S, N/A  | 90M-S,<br>6F11 | 2M-S, N/A        | 90S, 1E2      |

\*Samples with absent/reduced PR expression in Tumor 2

†Primary tumor, post endocrine therapy

§Primary tumor, no endocrine therapy

S, Strong; M, Moderate; W, Weak; N/A, Not available
